# Supplementary material for: Optimal treatment strategies for coronary artery disease in patients with advanced kidney disease: a meta-analysis
Source: PubMed Central journal article supplement — Ther Adv Chronic Dis. 2021 Jul 7;12:20406223211024367. doi: 10.1177/20406223211024367 (PMC8267045; doi:10.1177/20406223211024367), 2021-07-07
Supplement: sj-pdf-1-taj-10.1177_20406223211024367.pdf [file sj-pdf-1-taj-10.1177_20406223211024367.pdf]

## Supplementary data

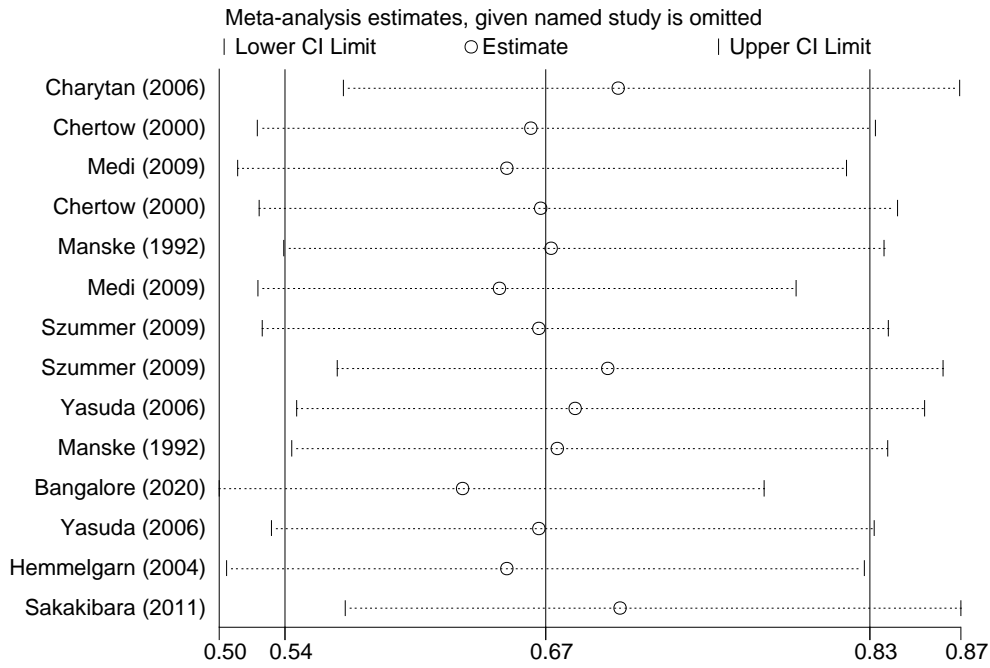

Supplementary Figure 1. Sensitivity analysis of PCI vs. MT.

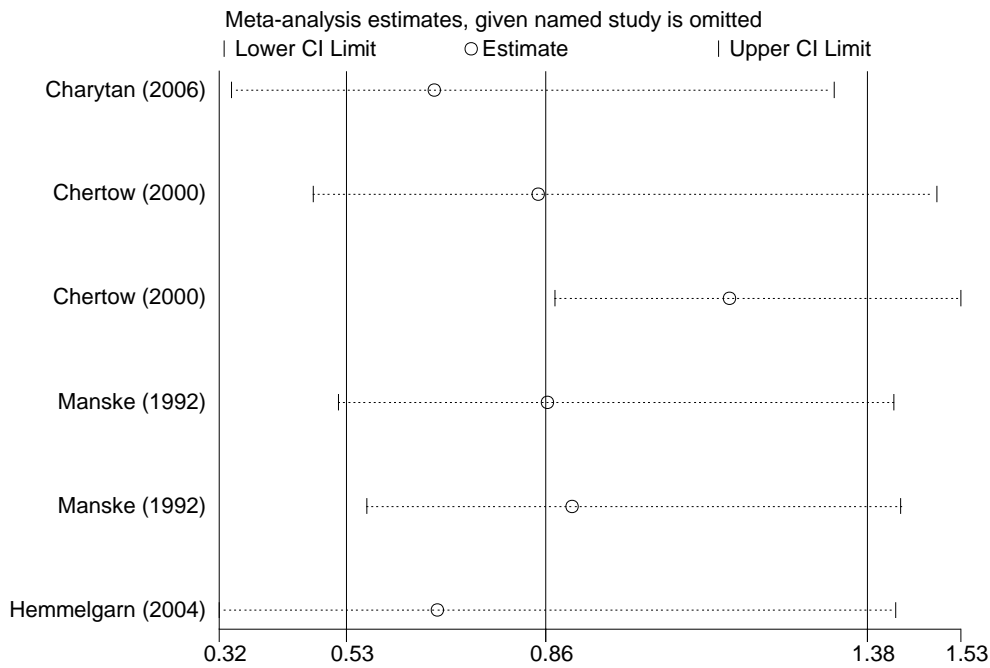

Supplementary Figure 2. Sensitivity analysis of CABG vs. MT.
